# Supplementary material for: Environmental prospecting of black yeast-like agents of human disease using culture-independent methodology
Source: PubMed Central journal article supplement (PMC7450056; doi:10.1038/s41598-020-70915-0), 2020-08-26
Supplement: 41598_2020_70915_MOESM2_ESM.pdf [file 41598_2020_70915_MOESM2_ESM.pdf]

## **Environmental prospecting of black yeast-like agents of human disease using culture-independent methodology**

Flávia de Fátima Costa<sup>1</sup>, Nickolas Menezes da Silva<sup>1</sup>, Morgana Ferreira Voidaleski<sup>2</sup>, Vinicius Almir Weiss<sup>2</sup>, Leandro Ferreira Moreno<sup>2</sup>, Gabriela Xavier Schneider<sup>2</sup>, Mohammad J. Najafzadeh<sup>3</sup>, Jiufeng Sun<sup>4</sup>, Renata Rodrigues Gomes<sup>2</sup>, Roberto Tadeu Raittz<sup>5</sup>, Mauro Antonio Alves Castro<sup>5</sup>, Graciela Bolzón Inez de Muniz<sup>6</sup>, G. Sybren de Hoog<sup>2,7,\*</sup>, Vania Aparecida Vicente<sup>1,2,\*</sup>

<sup>1</sup> Engineering Bioprocess and Biotechnology Post-Graduation Program, Department of Bioprocess Engineering and Biotechnology, Federal University of Paraná, Curitiba, Brazil

<sup>2</sup> Microbiology, Parasitology and Pathology Post-Graduation Program, Department of Pathology, Federal University of Paraná, Curitiba, Brazil

<sup>3</sup> Department of Parasitology and Mycology, School of Medicine, Mashhad University of Medical Sciences, Mashhad, Iran

<sup>4</sup> Guangdong Provincial Institute of Public Health, Guangdong Provincial Center for Disease Control and Prevention, Guangzhou, China

<sup>5</sup> Laboratory of Bioinformatics, Professional and Technological Education Sector, Federal University of Paraná, Curitiba, Brazil

<sup>6</sup> Central Laboratory in Nanotechnology, Federal University of Paraná, Curitiba, Brazil

<sup>7</sup> Center of Expertise in Mycology of Radboud University Medical Center / Canisius Wilhelmina Hospital, Nijmegen, The Netherlands

### **Supplementary Tables**

**Supplementary Table S2.** Molecular markers described in the literature of family Herpotrichiellaceae.

| Species                             | Strains                  | Source                       | Number pb |                   | Ref. |
|-------------------------------------|--------------------------|------------------------------|-----------|-------------------|------|
|                                     |                          |                              | Barcodes  | Probes<br>padlock |      |
| <i>Cladophialophora arxii</i>       | CBS 306.94 <sup>T</sup>  | Human                        | 35        | 42                | 1,2  |
|                                     | CBS 409.96               | Human                        | 37        | -                 | 1    |
| <i>Cladophialophora bantiana</i>    | CBS 173.52               | Human                        | 34        | 41                | 1,2  |
| <i>Cladophialophora chaetospora</i> | CBS 115468               | Plant                        | -         | 39                | 2    |
| <i>Cladophialophora carrionii</i>   | CBS 160.54 <sup>LT</sup> | Human                        | 29        | 42 /39            | 1-3  |
|                                     | CBS 163.54               | Human                        | 29        | -                 | 1    |
|                                     | CBS 260.83               | Human                        | 29        | -                 | 1    |
|                                     | FMC.248                  | Human                        | 29        | -                 | 1    |
| <i>Cladophialophora devriesii</i>   | CBS 147.84 <sup>T</sup>  | Human                        | 25        | 42                | 1,2  |
|                                     | IFM51369                 | -                            | 25        | -                 | 1    |
| <i>Cladophialophora emmonsii</i>    | CBS 979.96 <sup>T</sup>  | Human                        | 33        | -                 | 1    |
|                                     | CBS 640.96               | Cat, subcutaneous lesion     | 33        | -                 | 1    |
| <i>Cladophialophora immunda</i>     | CBS 834.96 <sup>T</sup>  | Human                        | 25        | 41 / 42           | 1,2  |
|                                     | CBS 102227               | Plant                        | 25        | -                 | 1    |
| <i>Cladophialophora minourae</i>    | CBS 987.96               | Rotting wood                 | -         | 42                | 2    |
| <i>Cladophialophora modesta</i>     | CBS 985.96 <sup>T</sup>  | Human                        | 26        | -                 | 1    |
| <i>Cladophialophora mycetomatis</i> | CBS 122637 <sup>T</sup>  | Human                        | 28        | -                 | 1    |
|                                     | CBS 454.82               | Culture contaminant          | 28        | -                 | 1    |
| <i>Cladophialophora psammophila</i> | CBS 110553 <sup>T</sup>  | Gasoline-polluted soil       | 34        | 41                | 1,2  |
| <i>Cladophialophora samoensis</i>   | CBS 259.83 <sup>T</sup>  | Human                        | 31        | -                 | 1    |
| <i>Cladophialophora saturnica</i>   | CBS 118724 <sup>T</sup>  | Child                        | 27        | 42                | 1,2  |
| <i>Cladophialophora subtilis</i>    | CBS 12264 <sup>T</sup>   | Iced tea                     | 30        | -                 | 1    |
| <i>Cladophialophora yegresii</i>    | CBS 114405 <sup>T</sup>  | Plant                        | 30        | 42                | 1,2  |
| <i>Exophiala alcalophila</i>        | CBS 520.82 <sup>T</sup>  | Soil                         | 31        | -                 | 1    |
| <i>Exophiala angulospora</i>        | CBS 482.92 <sup>T</sup>  | Water                        | 28        | 36                | 1,4  |
|                                     | CBS 122264               | Hydrocarbon-polluted<br>soil | 28        | -                 | 1    |
|                                     | CBS 109906               | Water                        | 28        | -                 | 1    |
| <i>Exophiala aquamarina</i>         | CBS 119918 <sup>T</sup>  | Seadragon, skin              | 38        | 37                | 1,4  |
| <i>Exophiala asiatica</i>           | BMU00015 <sup>T</sup>    | Human                        | 36        | -                 | 1    |
| <i>Exophiala attenuata</i>          | CBS110026                | Human                        | 29        | -                 | 1    |
| <i>Exophiala bergeri</i>            | CBS 353.52 <sup>T</sup>  | Human                        | 31        | -                 | 1    |
| <i>Exophiala brunnea</i>            | CBS 587.66 <sup>T</sup>  | Plant                        | 38        | -                 | 1    |
| <i>Exophiala cancerae</i>           | CBS 120532 <sup>T</sup>  | Crab                         | 34        | -                 | 1    |
| <i>Exophiala castellanii</i>        | CBS 158.58 <sup>T</sup>  | Human                        | 28        | 37                | 1,4  |

|                                 |                         |                 |    |    |     |
|---------------------------------|-------------------------|-----------------|----|----|-----|
| <i>Exophiala capensis</i>       | CBS 128771 <sup>T</sup> | Plant           | 31 | -  | 1   |
| <i>Exophiala dermatitidis</i>   | CBS 207.35 <sup>T</sup> | Human           | 32 | 36 | 1,5 |
|                                 | CBS 100338              | Humidifier      | 32 | -  | 1   |
|                                 | BMU00035                | Human           | 32 | -  | 1   |
| <i>Exophiala equina</i>         | CBS 119.23 <sup>T</sup> | Horse skin      | 38 | -  | 1   |
|                                 | CBS 122263              | Human foot      | 38 | -  | 1   |
|                                 | CBS 122270              | Human foot      | 38 | -  | 1   |
| <i>Exophiala exophialae</i>     | CBS 668.76 <sup>T</sup> | Straw in burrow | 32 | -  | 1   |
| <i>Exophiala halophila</i>      | CBS 121512 <sup>T</sup> | Human           | 34 | -  | 1   |
| <i>Exophiala heteromorpha</i>   | CBS 232.33 <sup>T</sup> | Wood pulp       | 29 | -  | 1   |
| <i>Exophiala jeanselmei</i>     | CBS 507.90 <sup>T</sup> | Human           | 36 | 37 | 1,5 |
|                                 | CBS 677.76              | Human           | 37 | -  | 1   |
| <i>Exophiala lacus</i>          | CBS 117497 <sup>T</sup> | Water           | 37 | -  | 1   |
| <i>Exophiala lecanii-corni</i>  | CBS 123.33 <sup>T</sup> | Human           | 29 | -  | 1   |
| <i>Exophiala mesophila</i>      | CBS 402.95 <sup>T</sup> | Shower          | 28 | -  | 1   |
|                                 | CBS 121511              | Human           | 28 | -  | 1   |
| <i>Exophiala moniliae</i>       | CBS 520.76 <sup>T</sup> | Plant           | 26 | -  | 1   |
| <i>Exophiala nishimurae</i>     | CBS 101538 <sup>T</sup> | Bark            | 32 | -  | 1   |
| <i>Exophiala oligosperma</i>    | CBS 725.88 <sup>T</sup> | Human           | 38 | 37 | 1,5 |
|                                 | UTHSC95-2041            | Human           | 38 | -  | 1   |
|                                 | UTHSC91###870           | Human           | 39 | -  | 1   |
|                                 | IFM41701                | Soil            | 40 | -  | 1   |
| <i>Exophiala opportunistica</i> | CBS109811               | Water           | 39 | 36 | 1,4 |
| <i>Exophiala pisciphila</i>     | CBS 537.73 <sup>T</sup> | Fish            | 39 | 37 | 1,4 |
| <i>Exophiala salmonis</i>       | CBS 157.67 <sup>T</sup> | Fish            | 37 | -  | 1   |
| <i>Exophiala sideris</i>        | CBS 121818 <sup>T</sup> | Plant           | 29 | -  | 1   |
| <i>Exophiala spinifera</i>      | CBS 899.68 <sup>T</sup> | Human           | 32 | 34 | 1,5 |
| <i>Exophiala siphonis</i>       | UTHSC88-471             | Human           | 27 | -  | 1   |
| <i>Exophiala xenobiotica</i>    | CBS 118157 <sup>T</sup> | Oil sludge      | 30 | 37 | 1,5 |
|                                 | CBS 119306              | Human           | 30 | -  | 1   |
|                                 | CBS 117665              | Human           | 30 | -  | 1   |
|                                 | CBS 117676              | Human           | 33 | -  | 1   |
|                                 | CBS 117641              | Human           | 32 | -  | 1   |
| <i>Fonsecaea erecta</i>         | dH20513                 | Plant           | 33 | -  | 1   |
|                                 | dH20502                 | Plant           | 33 | -  | 1   |
| <i>Fonsecaea minima</i>         | dH20511                 | Plant           | 33 | -  | 1   |
| <i>Fonsecaea monophora</i>      | CBS 269.37 <sup>T</sup> | Human           | 36 | 28 | 1,6 |
|                                 | CBS 121732              | Human           | 36 | -  | 1   |
|                                 | IFM4889                 | Human           | 36 | -  | 1   |
|                                 | IFM54446                | Human           | 36 | -  | 1   |

|                                  |                         |                         |    |    |      |
|----------------------------------|-------------------------|-------------------------|----|----|------|
| <i>Fonsecaea multimorphosa</i>   | CBS 980.96 <sup>T</sup> | Cat                     | 27 | -  | 1    |
| <i>Fonsecaea nubica</i>          | CBS 269.64 <sup>T</sup> | Human                   | 36 | 36 | 1, 6 |
|                                  | CBS 121733              | Human                   | 36 | -  | 1    |
|                                  | CBS 557.76              | Unknown                 | 36 | -  | 1    |
| <i>Fonsecaea pedrosoi</i>        | CBS 271.37 <sup>T</sup> | Human                   | 36 | 36 | 1, 6 |
|                                  | CBS 122741              | Human                   | 37 | -  | 1    |
| <i>Fonsecaea pugnacius</i>       | CBS 139214              | Human                   | -  | 31 | 7    |
| <i>Phialophora americana</i>     | CBS 840.69              | Decaying timber         | 30 | -  | 1    |
| <i>Phialophora verrucosa</i>     | CBS 273.37              | Human                   | 30 | -  | 1    |
|                                  | IMTSP.800               | Soil                    | 30 | -  | 1    |
|                                  | CBS 286.47              | Plant                   | 30 | -  | 1    |
|                                  | CBS 839.68              | Kiwifruit elephantiasis | 30 | -  | 1    |
| <i>Rhinocladiella anceps</i>     | CBS 181.65              | Soil                    | 30 | -  | 1    |
|                                  | CBS 157.54              | Plant                   | 32 | -  | 1    |
| <i>Rhinocladiella aquaspersa</i> | CBS 313.73 <sup>T</sup> | Human                   | 27 | -  | 1    |
| <i>Rhinocladiella atrovirens</i> | CBS 264.49              | Honey                   | 28 | -  | 1    |
| <i>Rhinocladiella basitona</i>   | CBS 101460 <sup>T</sup> | Human                   | 31 | -  | 1    |
| <i>Rhinocladiella mackenziei</i> | CBS 650.93 <sup>T</sup> | Human                   | 37 | -  | 1    |
|                                  | CBS 367.92              | Human                   | 35 | -  | 1    |
|                                  | CBS 102590              | Human                   | 35 | -  | 1    |
| <i>Rhinocladiella similis</i>    | CBS 111763 <sup>T</sup> | Human                   | 32 | -  | 1    |
|                                  | dH13054                 | Water                   | 32 | -  | 1    |
| <i>Veronaea botryosa</i>         | CBS 254.57 <sup>T</sup> | Sansa olive slag        | 40 | 35 | 1, 4 |
|                                  | CBS 350.65              | Dung of goat            | 41 | -  | 1    |
| <i>Veronaea compacta</i>         | CBS 268.75 <sup>T</sup> | Unknown                 | 38 | -  | 1    |
| <i>Veronaea japonica</i>         | CBS 776.83 <sup>T</sup> | Dead bamboo culm        | 38 | -  | 1    |

## References

1. Heinrichs, G., De Hoog, G. S. & Haase, G. Barcode identifiers as a practical tool for reliable species assignment of medically important black yeast species. *J. Clin. Microbiol.* **50**, 3023–3030, 10.1128/JCM.00574-12 (2012).
2. Hamzehei, H. *et al.* Use of rolling circle amplification to rapidly identify species of *Cladophialophora* potentially causing human infection. *Mycopathologia.* **175**, 431–438, 10.1007/s11046-013-9630-7 (2013).
3. Deng, S. *et al.* Three isothermal amplification techniques for rapid identification of *Cladophialophora carrionii*, an agent of human chromoblastomycosis. *J. Clin. Microbiol.* **52**, 3531–3535, 10.1128/JCM.01033-14 (2014).
4. Najafzadeh, M. J. *et al.* Rapid identification of seven waterborne *Exophiala* species by RCA DNA padlock probes. *Mycopathologia.* **183**, 669–677, 10.1007/s11046-018-0256-7 (2018).
5. Najafzadeh, M. J. *et al.* Detection and identification of opportunistic *Exophiala* species using the rolling circle amplification of ribosomal internal transcribed spacers. *J. Microbiol. Methods.* **94**, 338–342, 10.1016/j.mimet.2013.06.026 (2013).
6. Najafzadeh, M. J., Sun, J., Vicente, V. A. & de Hoog, G. S. Rapid identification of fungal

- pathogens by rolling circle amplification using *Fonsecaea* as a model. *Mycoses*. **54**, 577–582, 10.1111/j.1439-0507.2010.01995.x (2011).
7. Schneider, G. X. *et al.* New molecular markers distinguishing *Fonsecaea* agents of chromoblastomycosis. *Mycopathologia*. **184**, 493–504, 10.1007/s11046-019-00359-2 (2019).
